# Supplementary material for: Global Patterns and Climatic Controls of Dust-Associated Microbial Communities
Source: PubMed Central journal article supplement (PMC8515940; doi:10.1128/spectrum.01447-21), 2021-10-13
Supplement: spectrum01447-21_supp_1_seq4.pdf [file spectrum01447-21_supp_1_seq4.pdf]

## Supplemental Material for

### Global patterns and climatic controls of dust-associated microbial communities

Yongjian Chen<sup>1\*</sup>, Matthew J. Gebert<sup>2,3</sup>, Seth A. Faith<sup>4</sup>, Robert R. Dunn<sup>5</sup>, Noah Fierer<sup>2,3</sup>,  
Albert Barberán<sup>1</sup>

<sup>1</sup>Department of Environmental Science, University of Arizona, Tucson, AZ 85721, USA

<sup>2</sup>Department of Ecology and Evolutionary Biology, University of Colorado, Boulder, CO  
80309, USA

<sup>3</sup>Cooperative Institute for Research in Environmental Sciences, University of Colorado,  
Boulder, CO 80309, USA

<sup>4</sup>Department of Microbiology, The Ohio State University, Columbus, OH 43210, USA

<sup>5</sup>Department of Applied Ecology, North Carolina State University, Raleigh, NC 27695  
USA

#### **\*Corresponding author:**

Yongjian Chen (chenyj@email.arizona.edu)

#### **This PDF file includes:**

Figures S1 to S6

Table S1 and S2

■ Both ● Only bacteria ▲ Only fungi

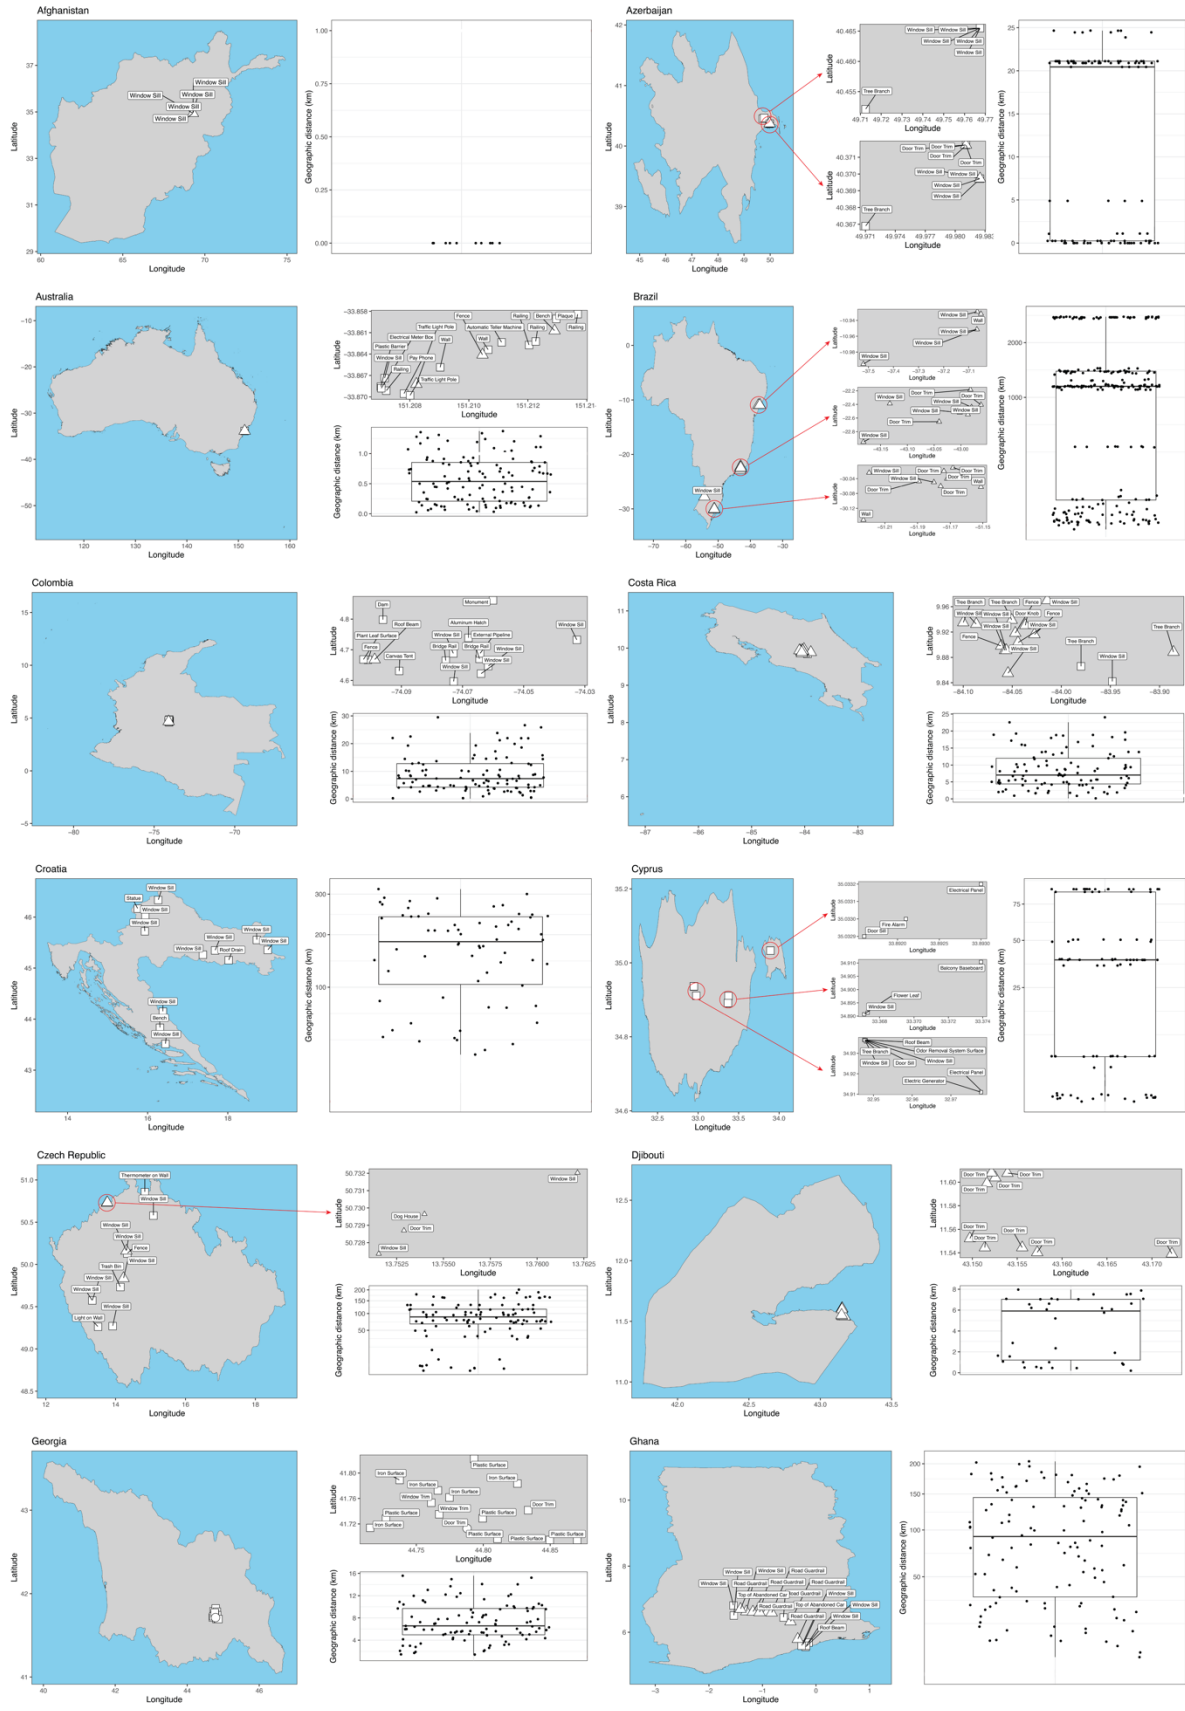

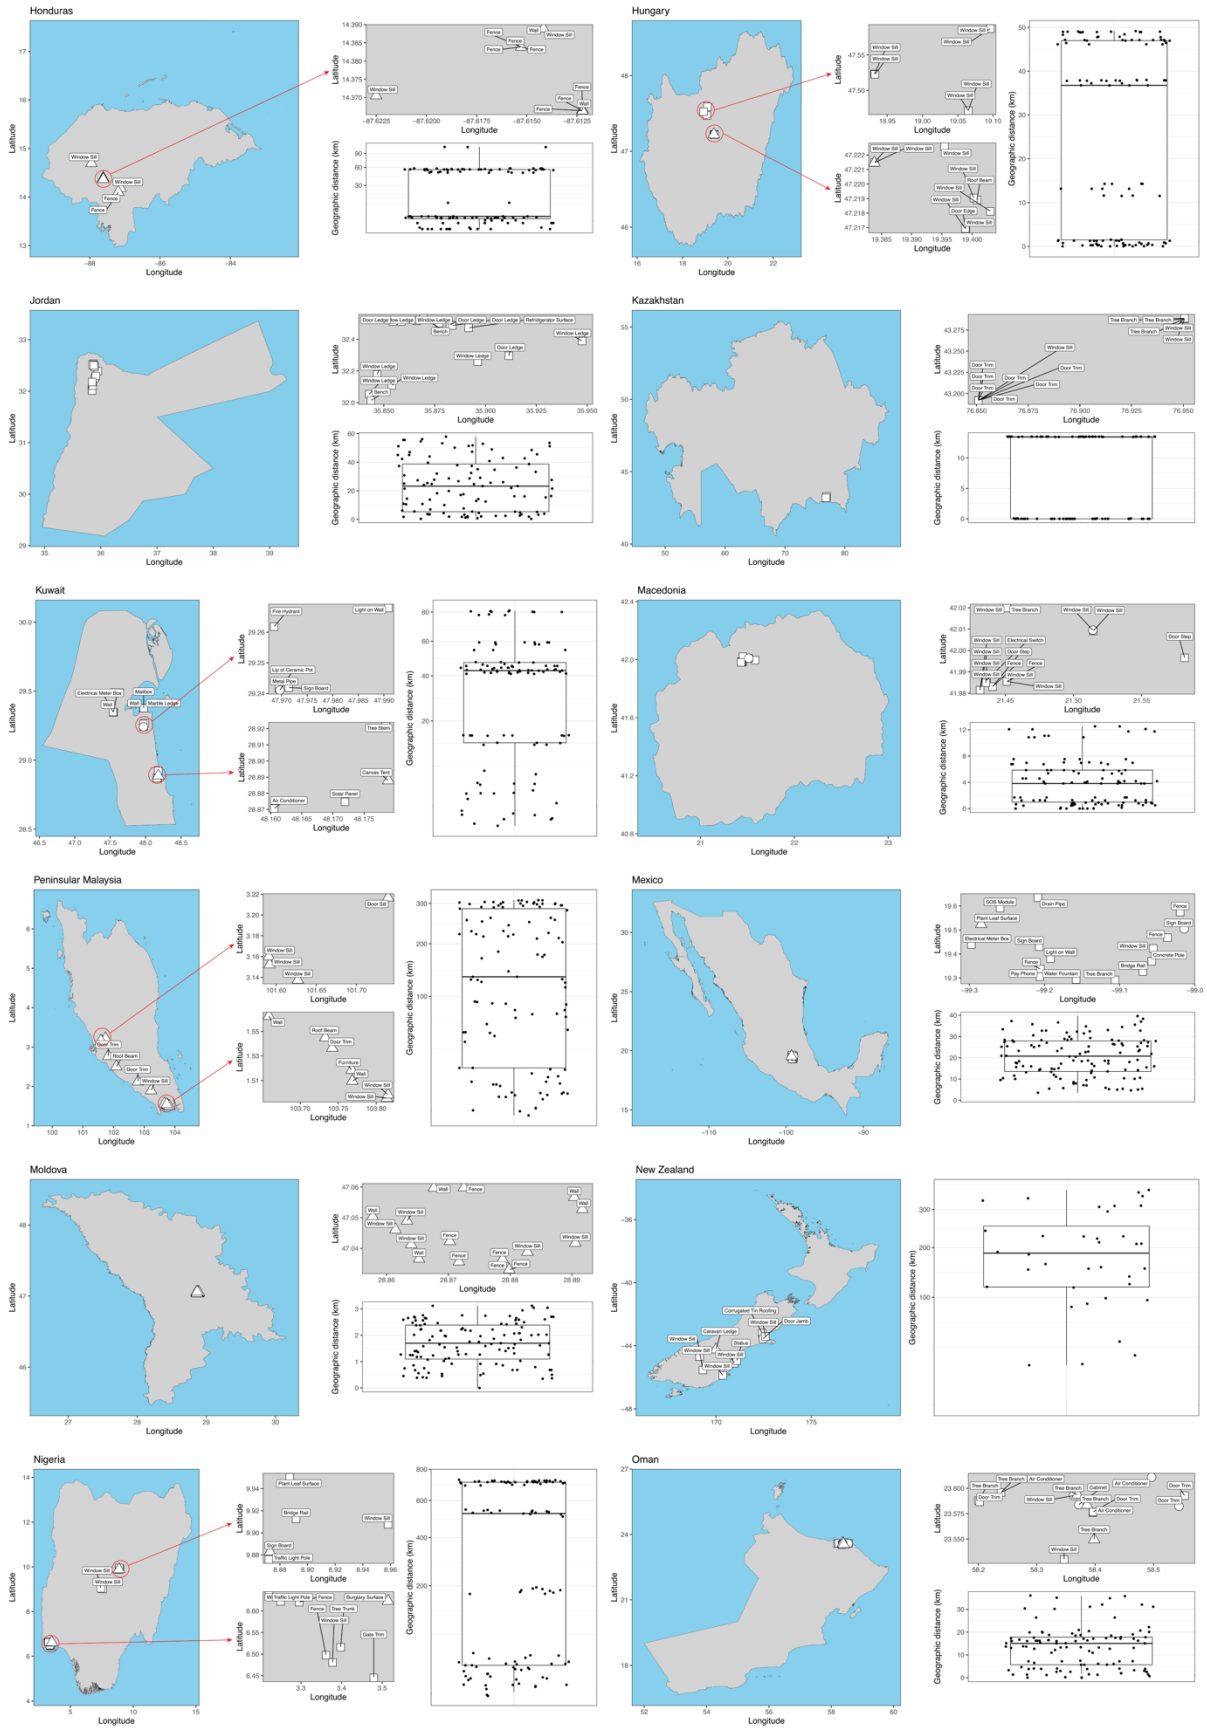



symbols denote samples having only fungal data. A zoomed view of the geographic distribution of dust samples is shown if it is unclear in the country map. Boxplots show the pairwise geographic distances between dust samples, data points are jittered to enhance clarity.

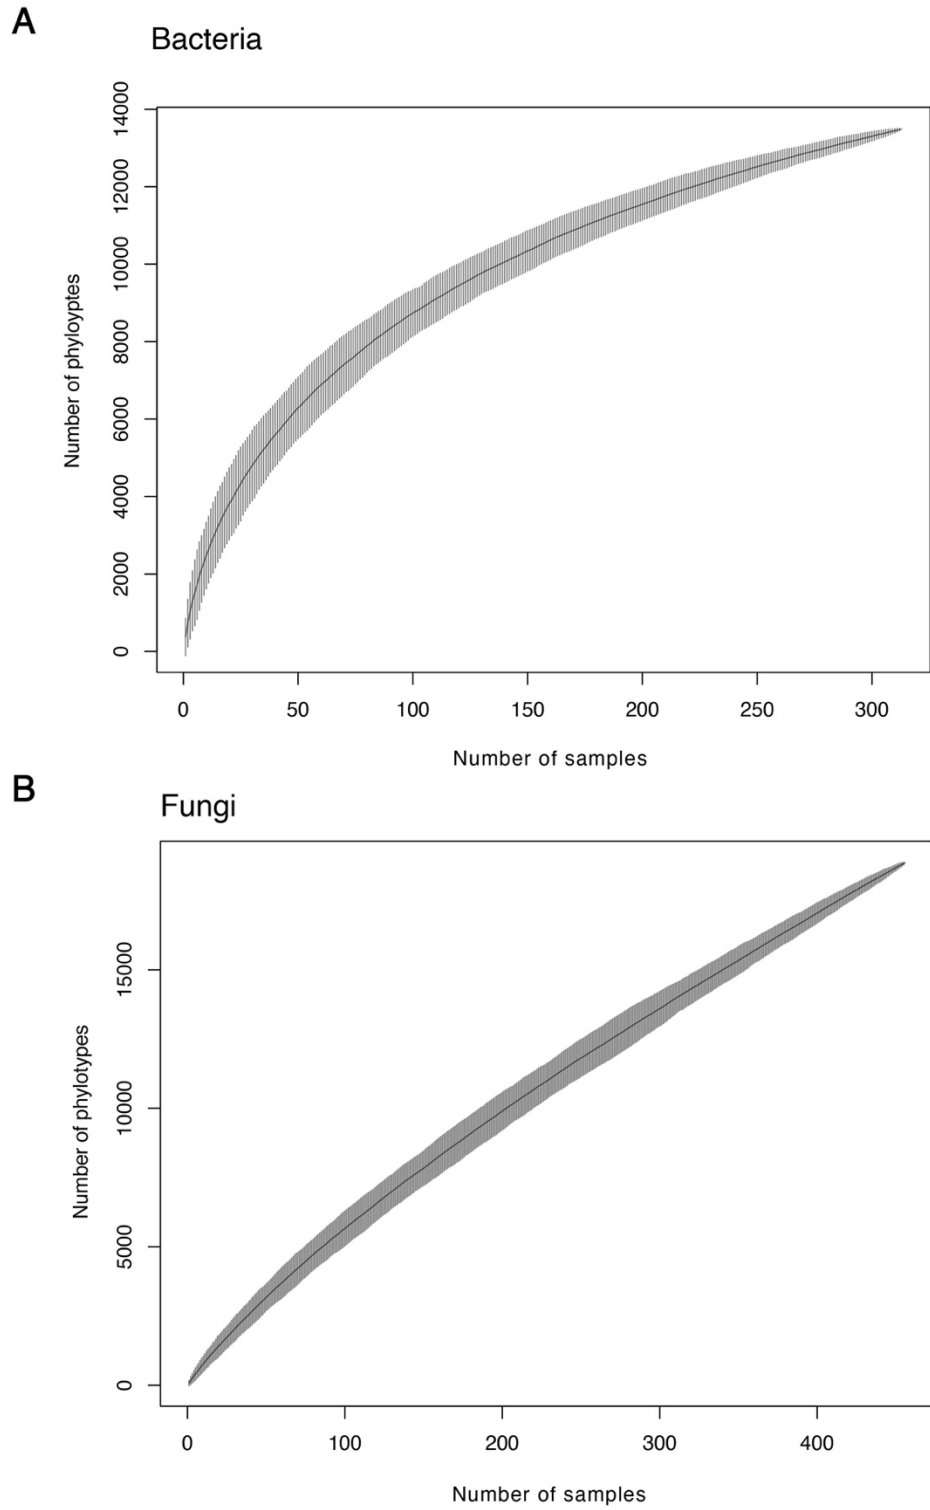

**Figure S2. Phylotype accumulation curves.**

**A**

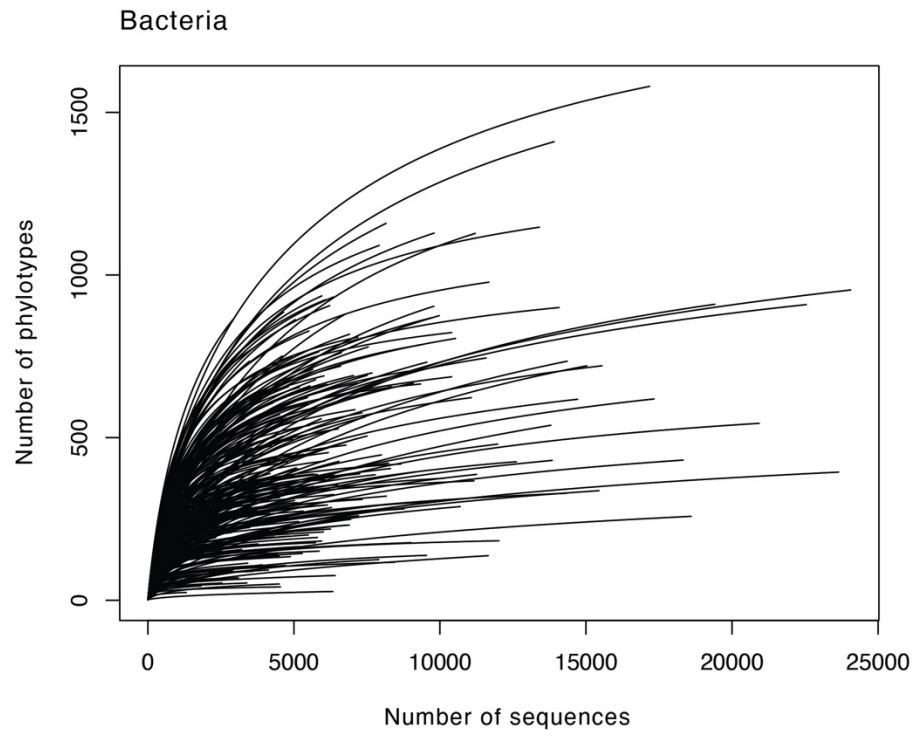

**B**

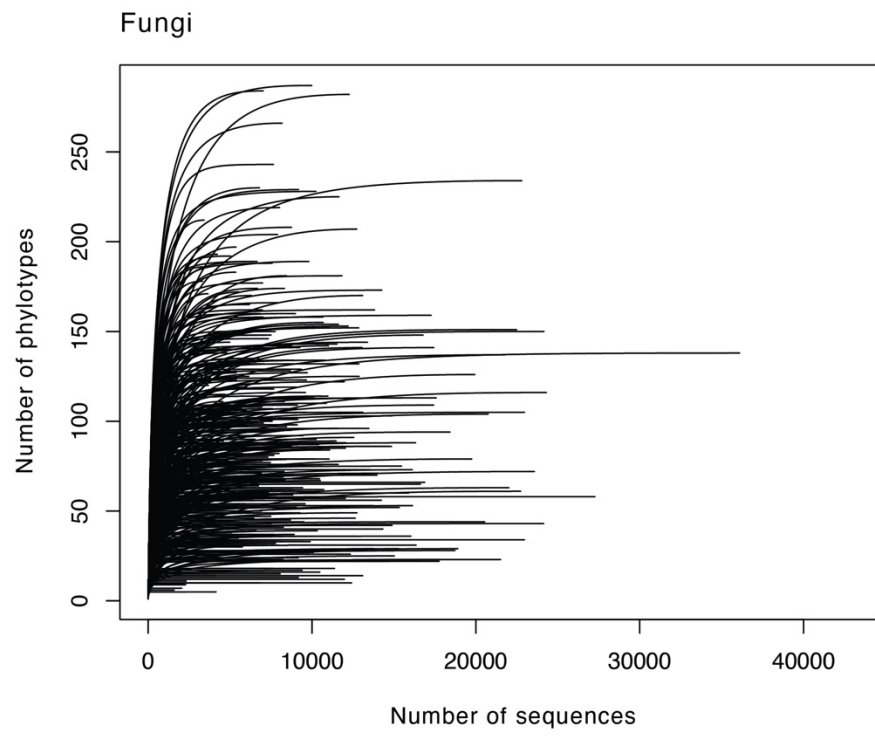

**Figure S3. Rarefaction curves.**

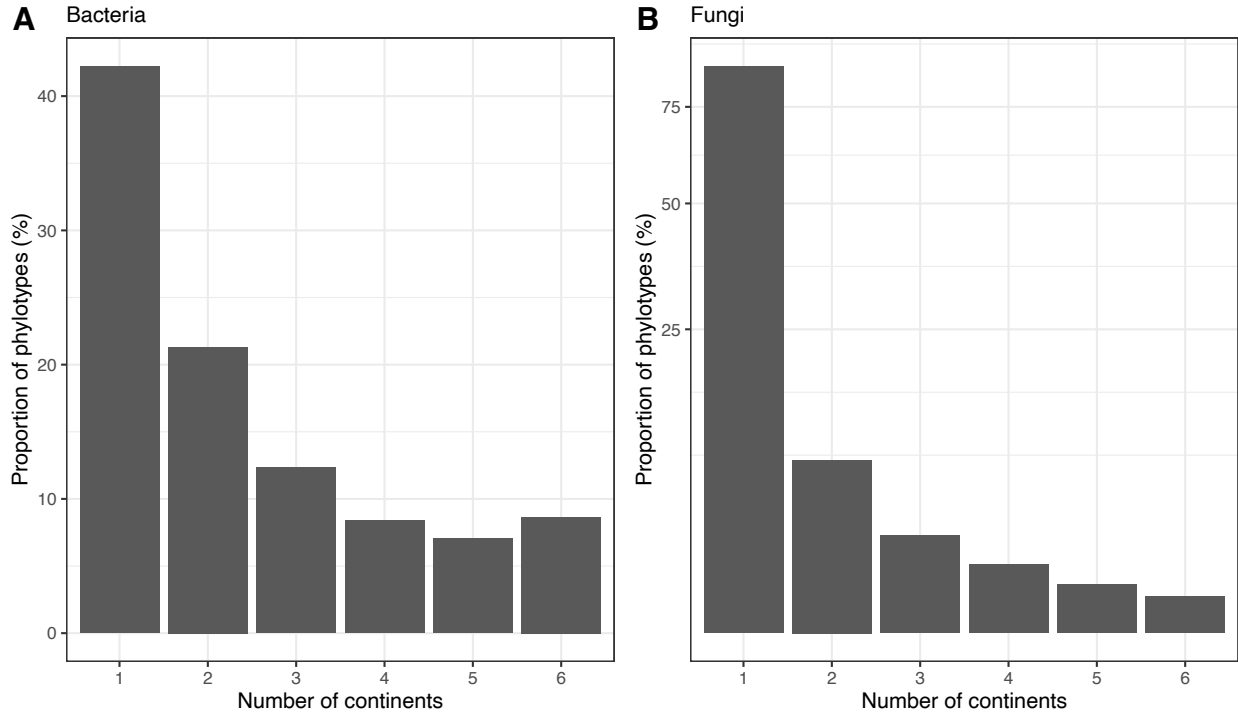

**Figure S4. Continental occupancy pattern of phylotypes.** The proportions of phylotypes detected in one, two, three, four, five, and six continents are shown.



**A** Bacteria (phylotype)

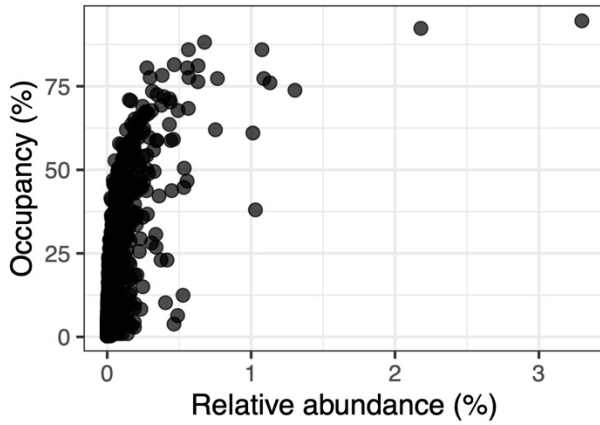

**B** Fungi (phylotype)

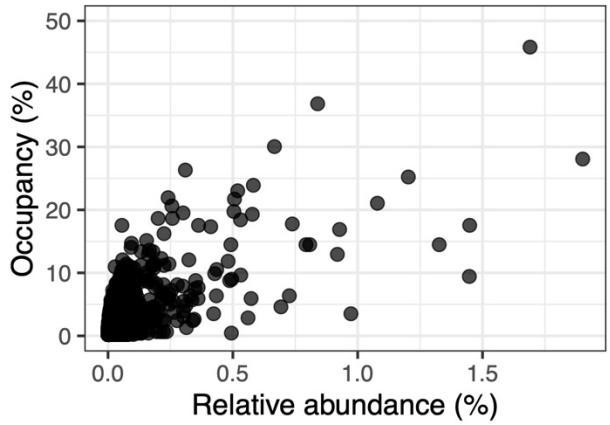

**C** Bacteria (genus)

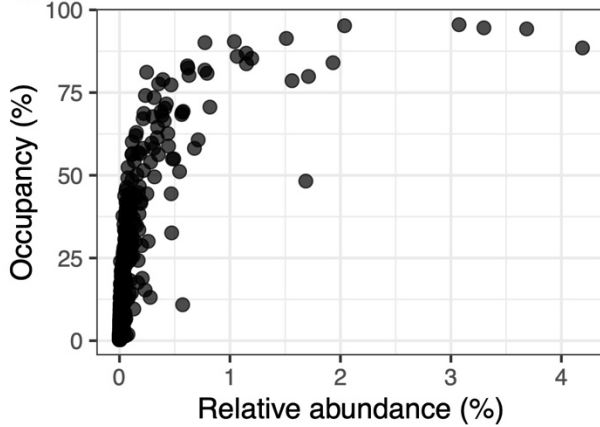

**D** Fungi (genus)

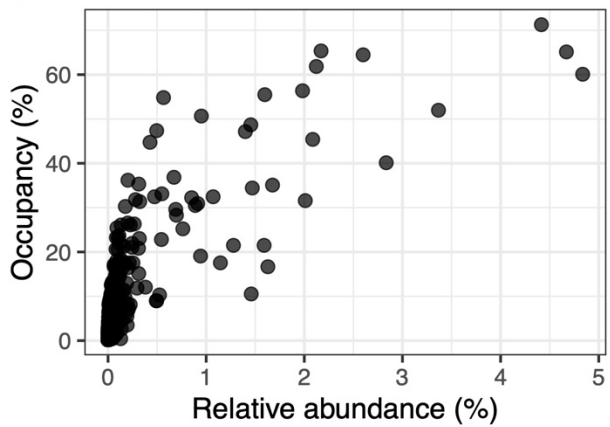

**Figure S5. Occupancy-abundance relationship.** The relationship between occupancy (proportion of samples) and relative abundance at the phylotype (A and B) and genus levels (C and D).

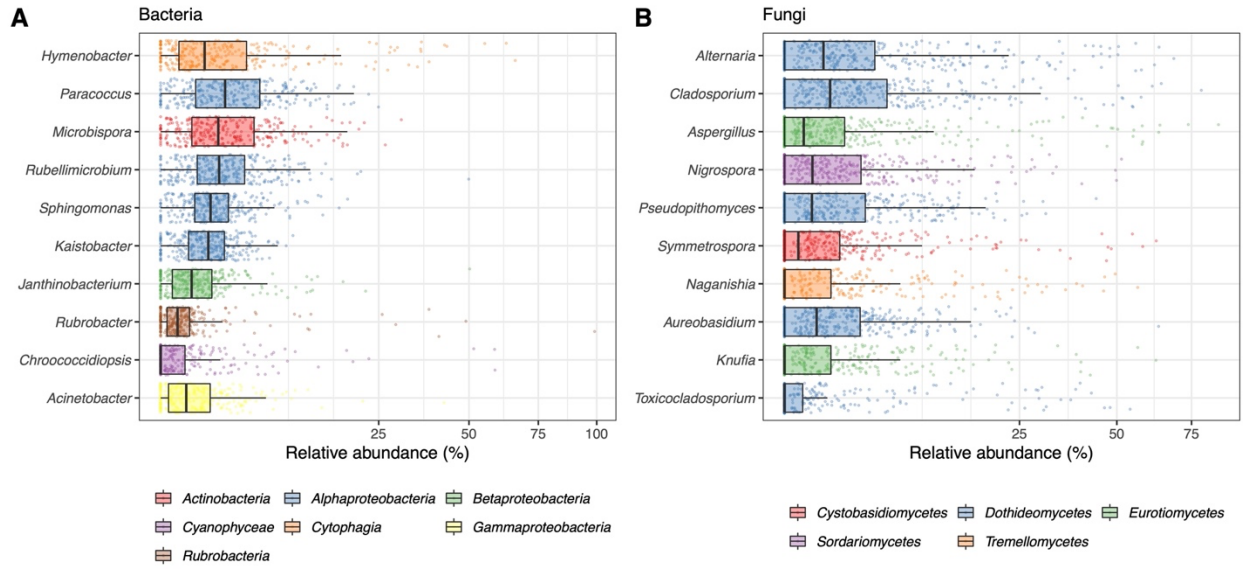

**Figure S6. Dominant microbial lineages at the genus level.** The top 10 most dominant bacterial genera (A) and fungal genera (B) are shown.

Table S1 Results of variation partitioning

|                                                               | Bacteria | Fungi  |
|---------------------------------------------------------------|----------|--------|
| Unique effect of environmental factors                        | 9.90%    | 10.94% |
| Unique effect of geographic distance                          | 1.34%    | 2.92%  |
| Joint effect of environmental factors and geographic distance | 2.97%    | 2.21%  |

Table S2 Climatic and soil variables in this study.

| Category                                    | Variable                                       | Database                       |
|---------------------------------------------|------------------------------------------------|--------------------------------|
| Climate                                     | <b>Mean annual temperature</b>                 | WorldClim                      |
|                                             | Mean diurnal range                             |                                |
|                                             | Isothermality                                  |                                |
|                                             | Temperature seasonality                        |                                |
|                                             | Max temperature of the warmest month           |                                |
|                                             | Min temperature of the coldest month           |                                |
|                                             | Temperature annual range                       |                                |
|                                             | <b>Mean temperature of the wettest quarter</b> |                                |
|                                             | Mean temperature of the driest quarter         |                                |
|                                             | Mean temperature of the warmest quarter        |                                |
|                                             | Mean temperature of the coldest quarter        |                                |
|                                             | <b>Temperature of the sampling month</b>       |                                |
|                                             | <b>Mean annual precipitation</b>               |                                |
|                                             | Precipitation of the wettest month             |                                |
|                                             | <b>Precipitation of the driest month</b>       |                                |
|                                             | Precipitation seasonality                      |                                |
|                                             | Precipitation of the wettest quarter           |                                |
| Precipitation of the driest quarter         |                                                |                                |
| Precipitation of the warmest quarter        |                                                |                                |
| <b>Precipitation of the coldest quarter</b> |                                                |                                |
| <b>Precipitation of the sampling month</b>  |                                                |                                |
| Soil                                        | <b>Bulk density</b>                            | Harmonized World Soil Database |
|                                             | Base saturation                                |                                |
|                                             | <b>Organic carbon</b>                          |                                |
|                                             | <b>pH</b>                                      |                                |

Variables in bold were retained after multicollinearity examination (variance inflation factor < 5).
